# Supplementary material for: Quartet-based methods to reconstruct phylogenetic networks
Source: PubMed Central journal article supplement (PMC3941989; doi:10.1186/1752-0509-8-21), 2014-02-20

**A**

### Effect of $c$ on the number of full splits constructed by QuartetA for bacteria data

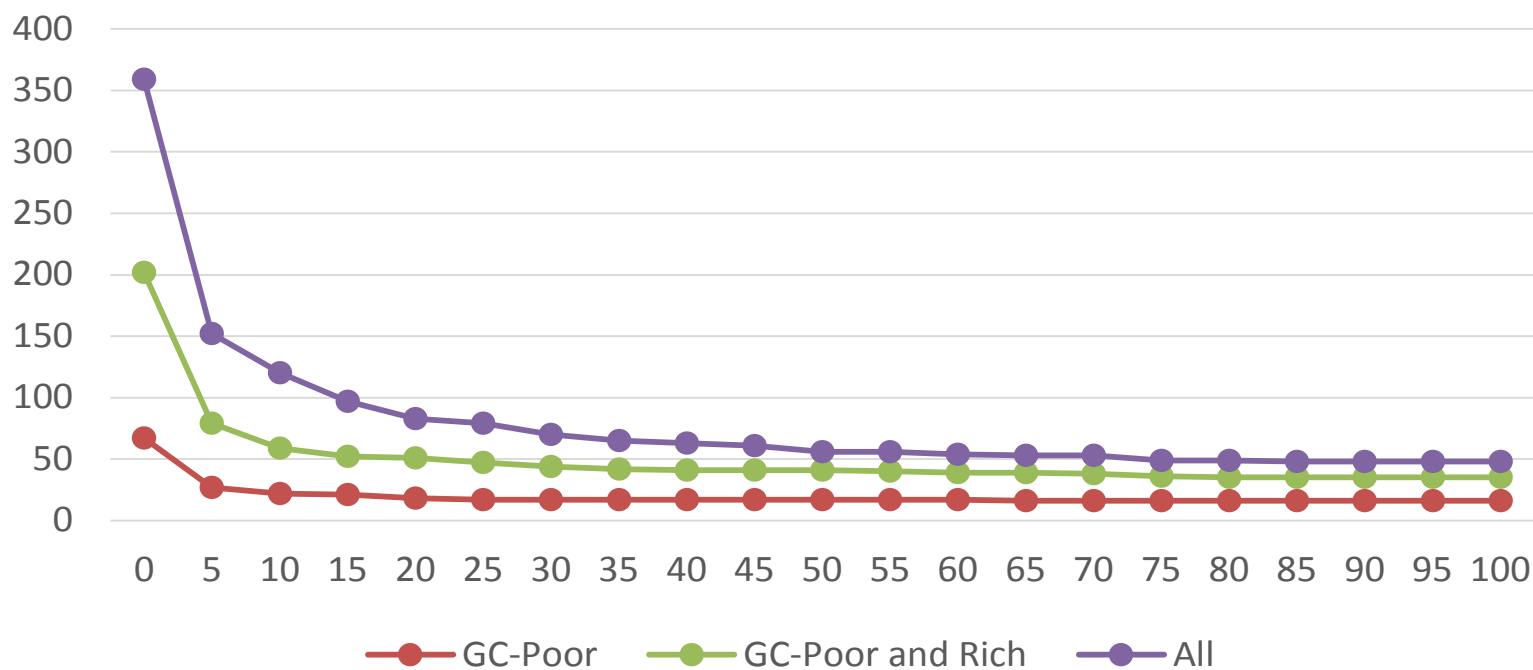**B**

### Effect of $c$ on the number of full splits constructed by QuartetS for bacteria data

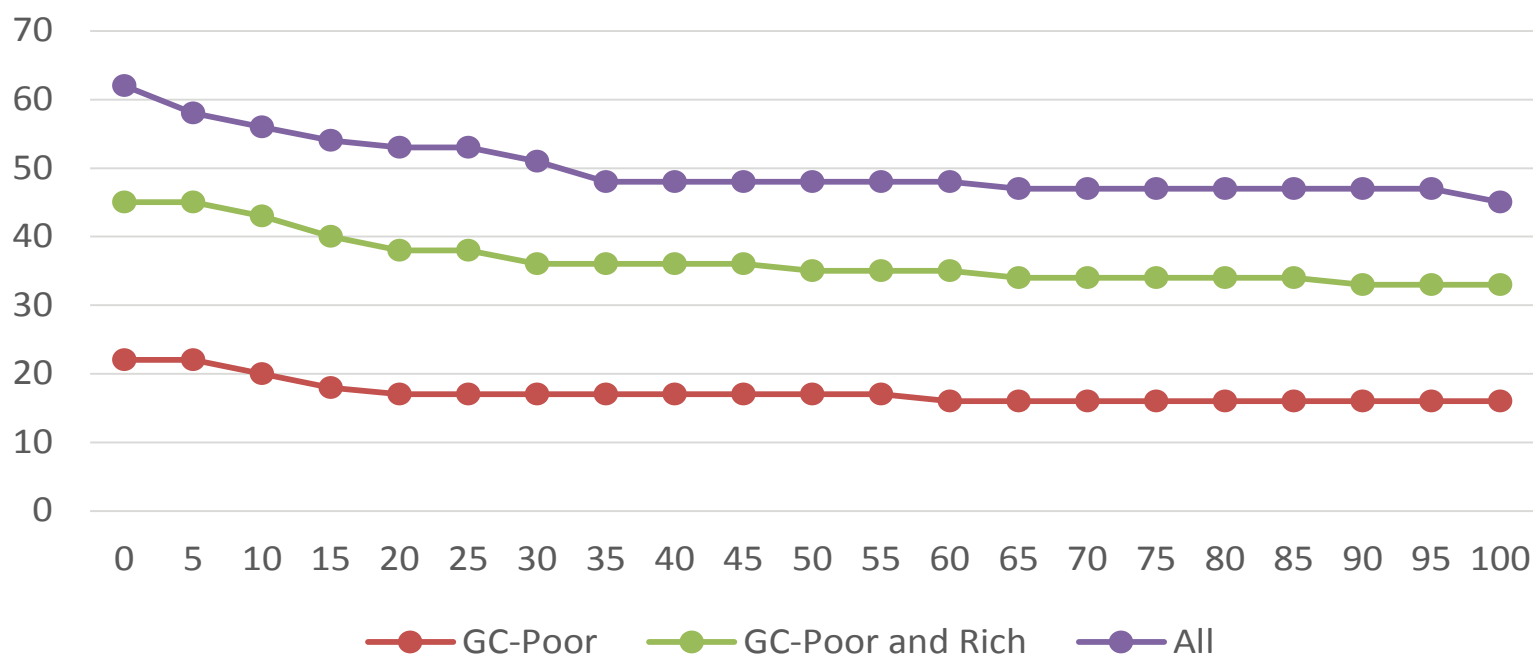

Supplement: 1752-0509-8-21-S1.pdf [file 1752-0509-8-21-S1.pdf]
